# Supplementary material for: Type I Interferon Signaling Regulates Ly6Chi Monocytes and Neutrophils during Acute Viral Pneumonia in Mice
Source: PubMed Central journal article supplement (PMC3044702; doi:10.1371/journal.ppat.1001304), 2011-02-24

**A**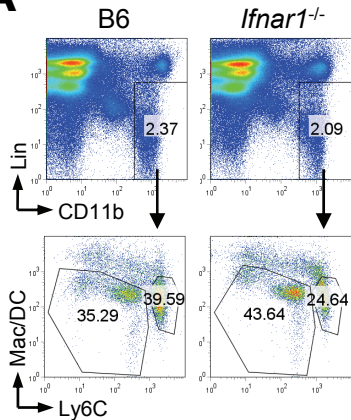**B**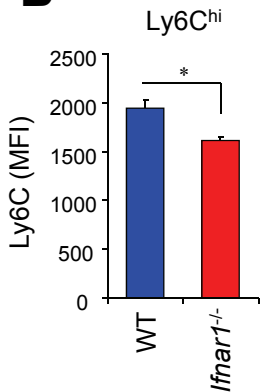**C**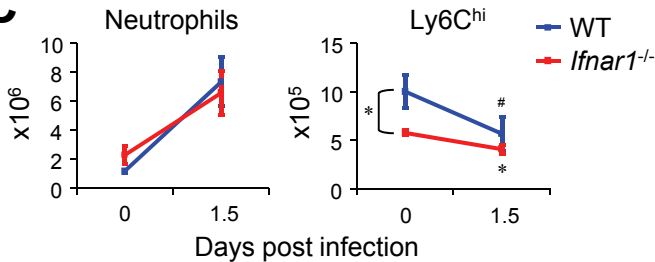

Supplement: ppat.1001304.s004.pdf [file ppat.1001304.s004.pdf]
